# Supplementary material for: Accelerometers Provide Early Genetic Selection Criteria for Jumping Horses
Source: Front Genet. 2020 May 19;11:448. doi: 10.3389/fgene.2020.00448 (PMC7248255; doi:10.3389/fgene.2020.00448)
Supplement: Supplementary File — Variance-Covariance matrices corresponding to Tables 3–7 in the text. [file Data_Sheet_1.xlsx]

## Sheet: Table 3
	genetic variance	variance of permanent environmental effect	residual variance	phenotypic variance
FAT	0.0683	0.22786	0.45546	0.75162
HAT	0.05586	0.19893	0.3544	0.60919
FAL	0.01522	0.15181	0.16053	0.32755
Log(HAT/FAL)	0.02077	0.06229	0.14032	0.22338
DFH	0.0001	0.00082	0.00289	0.0038
DHJ	2e-05	0.00044	0.00173	0.00219
DJ	0.00061	0.00139	0.00182	0.00383
DJL	1e-05	9e-05	0.00027	0.00037

## Sheet: Table 4
To avoid numerical problems, the variables were standardized to mean 0 and standard deviation of 1 before the analysis.
	residual matrix
	FAT	HAT	FAL	Log(HAT/FAL)	DJ
FAT	0.562518	-0.0834438	0.0204949	-0.370706	0.012727
HAT		0.558982	0.00569013	0.463525	0.0530069
FAL			0.474169	-0.00755689	0.084107
Log(HAT/FAL)				0.594107	0.0485269
DJ					0.434933
	Genetic matrix
	FAT	HAT	FAL	Log(HAT/FAL)	DJ
FAT	0.0895112	-0.0209856	0.0413456	-0.0696717	-0.00925231
HAT		0.100064	-0.0155956	0.0844496	-0.0190641
FAL			0.0484497	-0.0396783	0.0329827
Log(HAT/FAL)				0.103513	-0.00852107
DJ					0.153937
	Permanent environmental effect matrix.
	FAT	HAT	FAL	Log(HAT/FAL)	DJ
FAT	0.274748	0.0469237	0.153518	-0.103742	-0.0414762
HAT		0.308733	0.13039	0.228398	0.127998
FAL			0.444531	0.0275517	0.0566092
Log(HAT/FAL)				0.249717	0.139992
DJ					0.327612

## Sheet: Table 5
Trait 1 was performance in competition
Variance-Covariance matrices
Trait 1	Trait 1-2	Trait2	Matrix	Trait2
1.4871	0	0.56301	Residual	FAT
0.98517	0.05177	0.08922	genetic	FAT
0.69367	-0.02201	0.27379	Permanent Environmental	FAT
3.1659	0.02976	0.92601	Phenotypic	FAT
1.4871	0	0.55928	Residual	HAT
0.98499	0.05572	0.0779	genetic	HAT
0.69379	-0.03767	0.32627	Permanent Environmental	HAT
3.1659	0.01805	0.96345	Phenotypic	HAT
1.4871	0	0.47434	Residual	FAL
0.98531	0.12455	0.03886	genetic	FAL
0.69358	-0.08857	0.45275	Permanent Environmental	FAL
3.166	0.03598	0.96595	Phenotypic	FAL
1.4871	0	0.59379	Residual	Log(HAT/FAL)
0.98508	0.00922	0.08211	genetic	Log(HAT/FAL)
0.69372	-0.01165	0.26872	Permanent Environmental	Log(HAT/FAL)
3.1659	-0.00243	0.94463	Phenotypic	Log(HAT/FAL)
1.4871	0	0.43479	Residual	DJ
0.98549	0.21585	0.13466	genetic	DJ
0.69345	-0.03188	0.34455	Permanent Environmental	DJ
3.166	0.18397	0.914	Phenotypic	DJ

## Sheet: Table 6
Judge score	Matrix	FAT	FAL	Log(HAT/FAT)	DJ	Judge score
Free Jumping
Balance	Genetic Matrix	0.0985579	0.0480521	-0.0708765	0.0019097	0.0418766
Balance	Genetic Matrix	.	0.0587128	-0.0403827	0.0406855	0.0122144
Balance	Genetic Matrix	.	.	0.103061	-0.0107434	-0.0181281
Balance	Genetic Matrix	.	.	.	0.177004	0.168746
Balance	Genetic Matrix	.	.	.	.	0.263358
Balance	Permanent Environmantal Matrix	0.267484	0.147876	-0.102821	-0.0511516	-0.0154754
Balance	Permanent Environmantal Matrix	.	0.435384	0.0280425	0.0501708	-0.0220416
Balance	Permanent Environmantal Matrix	.	.	0.250312	0.141556	0.0699492
Balance	Permanent Environmantal Matrix	.	.	.	0.307472	0.021233
Balance	Permanent Environmantal Matrix	.	.	.	.	0.101157
Balance	Phenotypic Matrix	0.92852	0.216394	-0.544366	-0.0365476	0.0264013
Balance	Phenotypic Matrix	.	0.968277	-0.0198486	0.174926	-0.00982727
Balance	Phenotypic Matrix	.	.	0.9474	0.179353	0.0518211
Balance	Phenotypic Matrix	.	.	.	0.91936	0.189979
Balance	Phenotypic Matrix	.	.	.	.	0.841896
Balance	Residual Matrix	0.562477	0.020466	-0.370668	0.0126943	0
Balance	Residual Matrix	.	0.47418	-0.00750843	0.0840697	0
Balance	Residual Matrix	.	.	0.594028	0.0485407	0
Balance	Residual Matrix	.	.	.	0.434885	0
Balance	Residual Matrix	.	.	.	.	0.47738
Strength	Genetic Matrix	0.0967194	0.0505514	-0.0661275	-0.0018574	0.0343099
Strength	Genetic Matrix	.	0.0525744	-0.0352912	0.0433077	0.0311011
Strength	Genetic Matrix	.	.	0.104838	-0.00393725	0.0359365
Strength	Genetic Matrix	.	.	.	0.161314	0.162778
Strength	Genetic Matrix	.	.	.	.	0.329839
Strength	Permanent Environmantal Matrix	0.268515	0.145474	-0.106902	-0.047591	0.0171941
Strength	Permanent Environmantal Matrix	.	0.441325	0.0234546	0.0476071	-0.0569968
Strength	Permanent Environmantal Matrix	.	.	0.248528	0.135874	0.038616
Strength	Permanent Environmantal Matrix	.	.	.	0.321709	0.0892872
Strength	Permanent Environmantal Matrix	.	.	.	.	0.113657
Strength	Phenotypic Matrix	0.927734	0.216433	-0.543723	-0.0367651	0.051504
Strength	Phenotypic Matrix	.	0.968143	-0.0193715	0.174876	-0.0258957
Strength	Phenotypic Matrix	.	.	0.947422	0.180447	0.0745525
Strength	Phenotypic Matrix	.	.	.	0.917812	0.252065
Strength	Phenotypic Matrix	.	.	.	.	0.872179
Strength	Residual Matrix	0.562499	0.0204073	-0.370694	0.0126833	0
Strength	Residual Matrix	.	0.474244	-0.00753486	0.0839617	0
Strength	Residual Matrix	.	.	0.594055	0.0485105	0
Strength	Residual Matrix	.	.	.	0.434789	0
Strength	Residual Matrix	.	.	.	.	0.428683
Style	Genetic Matrix	0.0936602	0.0503873	-0.0680586	-0.00461714	0.0160194
Style	Genetic Matrix	.	0.0602938	-0.0387614	0.0487133	0.0366199
Style	Genetic Matrix	.	.	0.101471	-0.00718738	0.00337208
Style	Genetic Matrix	.	.	.	0.166894	0.157865
Style	Genetic Matrix	.	.	.	.	0.193597
Style	Permanent Environmantal Matrix	0.271491	0.145668	-0.105277	-0.0451439	-0.00775297
Style	Permanent Environmantal Matrix	.	0.434266	0.0265243	0.0425596	-0.108774
Style	Permanent Environmantal Matrix	.	.	0.251662	0.138537	0.0703361
Style	Permanent Environmantal Matrix	.	.	.	0.316962	0.0436449
Style	Permanent Environmantal Matrix	.	.	.	.	0.17494
Style	Phenotypic Matrix	0.927651	0.216481	-0.544009	-0.0370486	0.00826643
Style	Phenotypic Matrix	.	0.968764	-0.01972	0.175303	-0.0721544
Style	Phenotypic Matrix	.	.	0.947142	0.179853	0.0737081
Style	Phenotypic Matrix	.	.	.	0.918677	0.20151
Style	Phenotypic Matrix	.	.	.	.	0.908544
Style	Residual Matrix	0.5625	0.0204253	-0.370673	0.0127125	0
Style	Residual Matrix	.	0.474205	-0.00748289	0.0840305	0
Style	Residual Matrix	.	.	0.594009	0.0485041	0
Style	Residual Matrix	.	.	.	0.43482	0
Style	Residual Matrix	.	.	.	.	0.540007
Reactivity	Genetic Matrix	0.093409	0.0424996	-0.0691304	-0.00613929	0.00569217
Reactivity	Genetic Matrix	.	0.0559995	-0.0358538	0.0379141	-0.00378055
Reactivity	Genetic Matrix	.	.	0.104054	-0.00592051	0.0156964
Reactivity	Genetic Matrix	.	.	.	0.162423	0.141387
Reactivity	Genetic Matrix	.	.	.	.	0.206812
Reactivity	Permanent Environmantal Matrix	0.27137	0.152679	-0.104159	-0.0440673	0.0429198
Reactivity	Permanent Environmantal Matrix	.	0.438977	0.0240206	0.0525223	-0.025597
Reactivity	Permanent Environmantal Matrix	.	.	0.249194	0.137508	0.00727934
Reactivity	Permanent Environmantal Matrix	.	.	.	0.320132	0.0502123
Reactivity	Permanent Environmantal Matrix	.	.	.	.	0.133575
Reactivity	Phenotypic Matrix	0.927345	0.21563	-0.544026	-0.0374459	0.048612
Reactivity	Phenotypic Matrix	.	0.969171	-0.0193267	0.1745	-0.0293776
Reactivity	Phenotypic Matrix	.	.	0.947326	0.180062	0.0229757
Reactivity	Phenotypic Matrix	.	.	.	0.917477	0.191599
Reactivity	Phenotypic Matrix	.	.	.	.	0.888769
Reactivity	Residual Matrix	0.562566	0.0204508	-0.370737	0.0127607	0
Reactivity	Residual Matrix	.	0.474194	-0.00749346	0.0840634	0
Reactivity	Residual Matrix	.	.	0.594078	0.0484754	0
Reactivity	Residual Matrix	.	.	.	0.434922	0
Reactivity	Residual Matrix	.	.	.	.	0.548383
Jumping Test under saddle
Balance	Genetic Matrix	0.0964645	0.0523785	-0.0747754	-0.00718437	0.0354073
Balance	Genetic Matrix	.	0.0604786	-0.0434832	0.0367162	0.0368728
Balance	Genetic Matrix	.	.	0.105881	-0.0114375	-0.0139821
Balance	Genetic Matrix	.	.	.	0.152597	0.0656506
Balance	Genetic Matrix	.	.	.	.	0.16936
Balance	Permanent Environmantal Matrix	0.268817	0.143811	-0.0994009	-0.043082	-0.0186309
Balance	Permanent Environmantal Matrix	.	0.434437	0.030733	0.0532497	-0.042515
Balance	Permanent Environmantal Matrix	.	.	0.247757	0.142522	0.0579621
Balance	Permanent Environmantal Matrix	.	.	.	0.329253	0.045318
Balance	Permanent Environmantal Matrix	.	.	.	.	0.0918076
Balance	Phenotypic Matrix	0.927749	0.216676	-0.544827	-0.0375619	0.0167764
Balance	Phenotypic Matrix	.	0.969064	-0.0202526	0.174116	-0.00564214
Balance	Phenotypic Matrix	.	.	0.947692	0.179631	0.04398
Balance	Phenotypic Matrix	.	.	.	0.916713	0.110969
Balance	Phenotypic Matrix	.	.	.	.	0.716896
Balance	Residual Matrix	0.562468	0.0204865	-0.370651	0.0127045	0
Balance	Residual Matrix	.	0.474149	-0.00750241	0.0841505	0
Balance	Residual Matrix	.	.	0.594055	0.0485463	0
Balance	Residual Matrix	.	.	.	0.434862	0
Balance	Residual Matrix	.	.	.	.	0.455729
Strength	Genetic Matrix	0.0944622	0.0510729	-0.0700018	-0.0104321	0.0324407
Strength	Genetic Matrix	.	0.0564909	-0.0394452	0.0367166	0.0233845
Strength	Genetic Matrix	.	.	0.102242	-0.00847894	-1.3953e-05
Strength	Genetic Matrix	.	.	.	0.148798	0.0702508
Strength	Genetic Matrix	.	.	.	.	0.245616
Strength	Permanent Environmantal Matrix	0.270669	0.144831	-0.103571	-0.0402312	-0.0169984
Strength	Permanent Environmantal Matrix	.	0.437934	0.0272138	0.0531684	-0.0223464
Strength	Permanent Environmantal Matrix	.	.	0.251001	0.140021	0.0750327
Strength	Permanent Environmantal Matrix	.	.	.	0.3325	0.0862416
Strength	Permanent Environmantal Matrix	.	.	.	.	0.111192
Strength	Phenotypic Matrix	0.927597	0.216385	-0.544231	-0.0379552	0.0154424
Strength	Phenotypic Matrix	.	0.968592	-0.0197324	0.174016	0.00103813
Strength	Phenotypic Matrix	.	.	0.947273	0.180056	0.0750187
Strength	Phenotypic Matrix	.	.	.	0.916158	0.156492
Strength	Phenotypic Matrix	.	.	.	.	0.83158
Strength	Residual Matrix	0.562466	0.0204804	-0.370659	0.0127081	0
Strength	Residual Matrix	.	0.474167	-0.00750096	0.0841308	0
Strength	Residual Matrix	.	.	0.59403	0.0485138	0
Strength	Residual Matrix	.	.	.	0.43486	0
Strength	Residual Matrix	.	.	.	.	0.474773
Style	Genetic Matrix	0.0952691	0.0542401	-0.0692387	-0.00901229	0.0340058
Style	Genetic Matrix	.	0.0642319	-0.0380011	0.0373998	0.0439621
Style	Genetic Matrix	.	.	0.100435	-0.0110636	0.0164104
Style	Genetic Matrix	.	.	.	0.146429	0.0800339
Style	Genetic Matrix	.	.	.	.	0.282165
Style	Permanent Environmantal Matrix	0.269918	0.142021	-0.104158	-0.0414451	-0.00407834
Style	Permanent Environmantal Matrix	.	0.430739	0.0257863	0.0523765	-0.0484568
Style	Permanent Environmantal Matrix	.	.	0.252537	0.142243	0.0320176
Style	Permanent Environmantal Matrix	.	.	.	0.334526	0.0509536
Style	Permanent Environmantal Matrix	.	.	.	.	0.0870629
Style	Phenotypic Matrix	0.927651	0.216746	-0.544073	-0.0377694	0.0299275
Style	Phenotypic Matrix	.	0.969122	-0.019718	0.173907	-0.00449474
Style	Phenotypic Matrix	.	.	0.947005	0.179692	0.048428
Style	Phenotypic Matrix	.	.	.	0.915814	0.130988
Style	Phenotypic Matrix	.	.	.	.	0.821983
Style	Residual Matrix	0.562464	0.0204845	-0.370676	0.012688	0
Style	Residual Matrix	.	0.474151	-0.00750313	0.0841304	0
Style	Residual Matrix	.	.	0.594034	0.0485117	0
Style	Residual Matrix	.	.	.	0.434859	0
Style	Residual Matrix	.	.	.	.	0.452756
Reactivity	Genetic Matrix	0.0959573	0.0494788	-0.0734947	-0.0116387	0.0507105
Reactivity	Genetic Matrix	.	0.0531982	-0.038263	0.0360765	0.0107693
Reactivity	Genetic Matrix	.	.	0.105093	-0.00722661	-0.0273701
Reactivity	Genetic Matrix	.	.	.	0.151552	0.0473398
Reactivity	Genetic Matrix	.	.	.	.	0.212284
Reactivity	Permanent Environmantal Matrix	0.269386	0.146208	-0.100502	-0.0391626	-0.021893
Reactivity	Permanent Environmantal Matrix	.	0.440957	0.0262468	0.0537768	-0.0183548
Reactivity	Permanent Environmantal Matrix	.	.	0.248447	0.138783	0.0442499
Reactivity	Permanent Environmantal Matrix	.	.	.	0.329989	0.0702378
Reactivity	Permanent Environmantal Matrix	.	.	.	.	0.0913192
Reactivity	Phenotypic Matrix	0.927766	0.216184	-0.544635	-0.0381268	0.0288175
Reactivity	Phenotypic Matrix	.	0.968321	-0.0195389	0.173985	-0.00758552
Reactivity	Phenotypic Matrix	.	.	0.947579	0.180121	0.0168798
Reactivity	Phenotypic Matrix	.	.	.	0.916407	0.117578
Reactivity	Phenotypic Matrix	.	.	.	.	0.774302
Reactivity	Residual Matrix	0.562423	0.0204973	-0.370639	0.0126745	0
Reactivity	Residual Matrix	.	0.474165	-0.00752277	0.0841319	0
Reactivity	Residual Matrix	.	.	0.594039	0.0485647	0
Reactivity	Residual Matrix	.	.	.	0.434866	0
Reactivity	Residual Matrix	.	.	.	.	0.4707

## Sheet: Table 7
Judge score	Matrix	Performance in competition	Judge Score
Free Jumping
Balance	Genetic Matrix	0.984574	0.292197
Balance	Genetic Matrix	.	0.238163
Balance	Permanent Environmantal Matrix	0.694032	-0.0582038
Balance	Permanent Environmantal Matrix	.	0.105374
Balance	Phenotypic Matrix	3.1657	0.233993
Balance	Phenotypic Matrix	.	0.837352
Balance	Residual Matrix	1.48709	0
Balance	Residual Matrix	.	0.493815
Strength	Genetic Matrix	0.983989	0.37922
Strength	Genetic Matrix	.	0.28073
Strength	Permanent Environmantal Matrix	0.694424	-0.0855795
Strength	Permanent Environmantal Matrix	.	0.107321
Strength	Phenotypic Matrix	3.1655	0.29364
Strength	Phenotypic Matrix	.	0.863597
Strength	Residual Matrix	1.48709	0
Strength	Residual Matrix	.	0.475546
Style	Genetic Matrix	0.984743	0.329232
Style	Genetic Matrix	.	0.186076
Style	Permanent Environmantal Matrix	0.693932	-0.060646
Style	Permanent Environmantal Matrix	.	0.126175
Style	Phenotypic Matrix	3.16576	0.268586
Style	Phenotypic Matrix	.	0.906225
Style	Residual Matrix	1.48709	0
Style	Residual Matrix	.	0.593974
Reactivity	Genetic Matrix	0.984873	0.303415
Reactivity	Genetic Matrix	.	0.206883
Reactivity	Permanent Environmantal Matrix	0.693846	-0.0642493
Reactivity	Permanent Environmantal Matrix	.	0.120015
Reactivity	Phenotypic Matrix	3.16581	0.239166
Reactivity	Phenotypic Matrix	.	0.887411
Reactivity	Residual Matrix	1.48709	0
Reactivity	Residual Matrix	.	0.560513
Jumping Test under saddle
Balance	Genetic Matrix	0.984969	0.216352
Balance	Genetic Matrix	.	0.16785
Balance	Permanent Environmantal Matrix	0.693753	0.0355828
Balance	Permanent Environmantal Matrix	.	0.0943952
Balance	Phenotypic Matrix	3.16582	0.251935
Balance	Phenotypic Matrix	.	0.71713
Balance	Residual Matrix	1.4871	0
Balance	Residual Matrix	.	0.454885
Strength	Genetic Matrix	0.984595	0.301944
Strength	Genetic Matrix	.	0.232579
Strength	Permanent Environmantal Matrix	0.694016	-0.00812512
Strength	Permanent Environmantal Matrix	.	0.100951
Strength	Phenotypic Matrix	3.1657	0.293818
Strength	Phenotypic Matrix	.	0.829134
Strength	Residual Matrix	1.48709	0
Strength	Residual Matrix	.	0.495603
Style	Genetic Matrix	0.984661	0.286988
Style	Genetic Matrix	.	0.268998
Style	Permanent Environmantal Matrix	0.693965	0.00502961
Style	Permanent Environmantal Matrix	.	0.0934541
Style	Phenotypic Matrix	3.16572	0.292018
Style	Phenotypic Matrix	.	0.821501
Style	Residual Matrix	1.48709	0
Style	Residual Matrix	.	0.459049
Reactivity	Genetic Matrix	0.985107	0.226156
Reactivity	Genetic Matrix	.	0.216334
Reactivity	Permanent Environmantal Matrix	0.693709	0.0407199
Reactivity	Permanent Environmantal Matrix	.	0.0966345
Reactivity	Phenotypic Matrix	3.1659	0.266876
Reactivity	Phenotypic Matrix	.	0.776079
Reactivity	Residual Matrix	1.48709	0
Reactivity	Residual Matrix	.	0.463111
